# Supplementary material for: Expression of the ACE2 virus entry protein in the nervus terminalis reveals the potential for an alternative route to brain infection in COVID-19
Source: PubMed Central journal article supplement — bioRxiv. 2021 Jun 7:2021.04.11.439398. Originally published 2021 Apr 12. Preprint. [Version 2] doi: 10.1101/2021.04.11.439398 (PMC8057234; doi:10.1101/2021.04.11.439398), 2021-06-07
Supplement: NIHPP2021.04.11.439398-supplement-1.pdf [file NIHPP2021.04.11.439398-supplement-1.pdf]

## SUPPLEMENTARY MATERIAL

## SUPPLEMENTAL TABLES

**Table S1.** Primary and secondary antibodies used in this study.

| Primary antibodies   | Company     | Cat. #     | Type                  |
|----------------------|-------------|------------|-----------------------|
| ACE2                 | R&D Systems | AF3437     | goat polyclonal       |
| GnRH1                | Proteintech | 26950-1-AP | rabbit polyclonal     |
| CHAT                 | Proteintech | 24418-1-AP | rabbit polyclonal     |
| OMP                  | WAKO        | 544-10001  | goat polyclonal       |
| Secondary antibodies |             |            | Fluorescent conjugate |
| donkey anti-rabbit   | Abcam       | ab15006    | AF488                 |
| donkey anti-goat     | Abcam       | ab150136   | AF594                 |

Abbreviations: ACE2, angiotensin converting enzyme 2; CHAT, choline acetyltransferase; GnRH1, gonadotropin releasing hormone 1; OMP, olfactory marker protein.

## SUPPLEMENTAL FIGURES

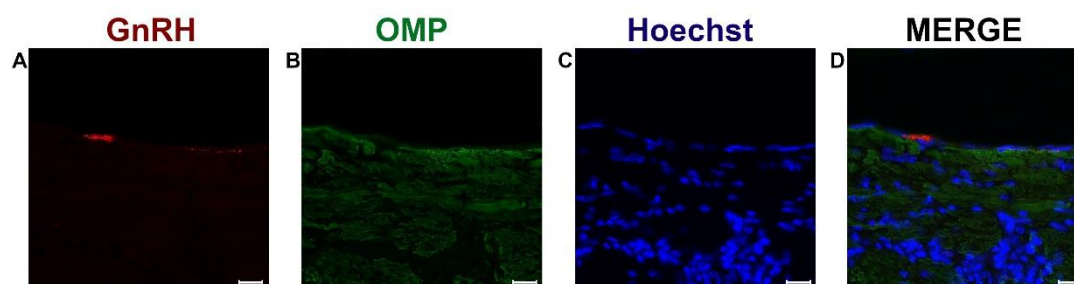

**Fig. S1.** Example of double immunofluorescent labeling for nervus terminalis neuronal markers GnRH (A) and olfactory marker protein (OMP) (B) in the medial region adjacent to the olfactory bulbs as indicated in Fig. 1. Nuclei are stained with Hoechst 33258 (C) and the merged image is shown in (D). GnRH-labeled cells were never labeled for OMP in this region. Scale bars: 20  $\mu$ m.
